# Supplementary material for: Plant-Based Diets and Risk of Hip Fracture in Postmenopausal Women
Source: PubMed Central journal article supplement (PMC10905300; doi:10.1001/jamanetworkopen.2024.1107), 2024-02-29
Supplement: jamanetwopen-e241107-s001.pdf [file jamanetwopen-e241107-s001.pdf]

## Supplementary Online Content

Sotos-Prieto M, Rodriguez-Artalejo F, Fung TT, et al. Plant-based diets and risk of hip fracture in postmenopausal women. *JAMA Netw Open*. 2024;7(2):e241107.  
doi:10.1001/jamanetworkopen.2024.1107

**eFigure.** Flowchart of participants for the analysis of adherence to plant-based diet indices with risk of fracture

**eTable 1.** Food items and criteria for scoring each plant-based diet indices (from the 1984 NHS food frequency questionnaire)

**eTable 2.** Relative risks (95% confidence interval) for hip fracture according to quintiles of cumulative modified-healthy plant-based diet scores in the Nurses' Health Study (n= 70,285 postmenopausal)

**eTable 3.** Relative risks (95% confidence interval) for hip fracture according to quintiles of cumulative food categories scores in the Nurses' Health Study (n= 70,285, postmenopausal)

**eTable 4.** Relative risks (95% confidence interval) for hip fracture according to quintiles of cumulative plant-based diet indices with different latency periods in the Nurses' Health Study

**eTable 5.** Relative Risks (95% confidence interval) for hip fracture according to quintiles of cumulative plant-based diet indices with different latency periods in the Nurses' Health Study

This supplementary material has been provided by the authors to give readers additional information about their work

**eFigure1.** Flowchart of participants for the analysis of adherence to plant-based diet indices with risk of fracture

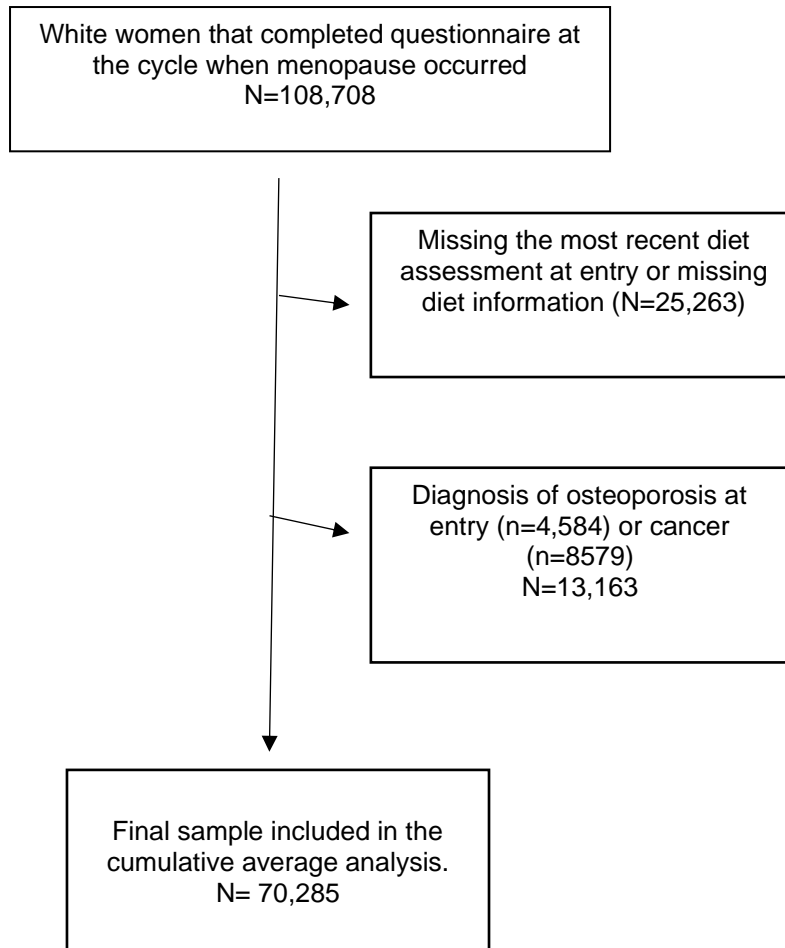

**eTable1. Food items and criteria for scoring each plant-based diet indices (from the 1984 NHS food frequency questionnaire)**

|                                   |                                                                                                                                                                                                                                                                                                                                                                                                                                                                             | hPDI            | uPDI           |
|-----------------------------------|-----------------------------------------------------------------------------------------------------------------------------------------------------------------------------------------------------------------------------------------------------------------------------------------------------------------------------------------------------------------------------------------------------------------------------------------------------------------------------|-----------------|----------------|
| <b><i>Healthy plant foods</i></b> |                                                                                                                                                                                                                                                                                                                                                                                                                                                                             |                 |                |
| Whole grains                      | Whole grain breakfast cereal, other cooked breakfast cereal, cooked oatmeal, dark bread, brown rice, other grains, bran, wheat germ, popcorn                                                                                                                                                                                                                                                                                                                                | Positive scores | Reverse scores |
| Fruits                            | Raisins or grapes, prunes, bananas, cantaloupe, watermelon, avocado, fresh apples, applesauce, fresh pears, canned pears, oranges, grapefruit, strawberries, blueberries, peaches or apricots or plums, canned peaches or apricots, other canned fruit                                                                                                                                                                                                                      | Positive scores | Reverse scores |
| Vegetables                        | Tomatoes, tomato juice, tomato sauce, red chili sauce, broccoli, cauliflower, cooked cabbage, coleslaw or uncooked cabbage, Brussels sprouts, raw carrots, cooked carrots, mixed vegetables, yams or sweet potatoes, yellow or winter squash, eggplant or zucchini or other summer squash, kale or mustard or chard greens, cooked spinach, raw spinach, iceberg or head lettuce, romaine or leaf lettuce, green pepper, cucumber, celery, mushrooms, alfalfa sprouts, corn | Positive scores | Reverse scores |
| Nuts                              | Nuts, peanut butter                                                                                                                                                                                                                                                                                                                                                                                                                                                         | Positive scores | Reverse scores |
| Legumes                           | String beans, tofu or soybeans, beans or lentils, peas or lima beans                                                                                                                                                                                                                                                                                                                                                                                                        | Positive scores | Reverse scores |
| Vegetable oil                     | Vegetable oil, oil-based salad dressing                                                                                                                                                                                                                                                                                                                                                                                                                                     | Positive scores | Reverse scores |

|                                 |                                                                                                                                                                                                                                                                        |                 |                 |
|---------------------------------|------------------------------------------------------------------------------------------------------------------------------------------------------------------------------------------------------------------------------------------------------------------------|-----------------|-----------------|
| Tea and coffee                  | Tea, coffee, decaffeinated coffee or non-caffeinated tea                                                                                                                                                                                                               | Positive scores | Reverse scores  |
| <b>Less healthy plant foods</b> |                                                                                                                                                                                                                                                                        |                 |                 |
| Refined grains                  | Refined grain breakfast cereal, white bread, English muffins or bagels or rolls, muffins or biscuits, white rice, pancakes or waffles, crackers, pasta                                                                                                                 | Reverse scores  | Positive scores |
| Potatoes                        | French fries, baked or boiled or mashed potatoes, potato or corn chips                                                                                                                                                                                                 | Reverse scores  | Positive scores |
| Sugar-sweetened beverages       | Soda with sugar, noncarbonated fruit drinks with sugar                                                                                                                                                                                                                 | Reverse scores  | Positive scores |
| Fruit juices                    | Apple cider (nonalcoholic) or juice, orange juice, grapefruit juice, other fruit juice                                                                                                                                                                                 | Reverse scores  | Positive scores |
| Sweets and desserts             | Chocolates, candy bars, candy without chocolate, cookies (home-baked and ready-made), brownies, doughnuts, cake (home-made and ready-made), sweet roll or coffee cake or other pastry, pie (home-baked and ready-made), jams or jellies or preserves or syrup or honey | Reverse scores  | Positive scores |
| <b>Animal foods</b>             |                                                                                                                                                                                                                                                                        |                 |                 |
| Animal fat                      | Butter added to food, butter or lard used for cooking                                                                                                                                                                                                                  | Reverse scores  | Reverse scores  |
| Dairy                           | Skim low fat milk, whole milk, cream, sour cream, sherbet, ice cream, yogurt, cottage or ricotta cheese, cream cheese, other cheese                                                                                                                                    | Reverse scores  | Reverse scores  |
| Eggs                            | Eggs                                                                                                                                                                                                                                                                   | Reverse scores  | Reverse scores  |

|                                  |                                                                                                                                                                                            |                |                |
|----------------------------------|--------------------------------------------------------------------------------------------------------------------------------------------------------------------------------------------|----------------|----------------|
| Fish and seafood                 | Canned tuna, dark meat fish, other fish, shrimp or lobster or scallops                                                                                                                     | Reverse scores | Reverse scores |
| Meat                             | Chicken or turkey with skin, chicken or turkey without skin, bacon, hot dogs, processed meats, hamburger, liver, beef or pork or lamb as a mixed dish, beef or pork or lamb as a main dish | Reverse scores | Reverse scores |
| Miscellaneous animal-based foods | Pizza, chowder or cream soup, mayonnaise or other creamy salad dressing                                                                                                                    | Reverse scores | Reverse scores |

---

Abbreviations: hPDI, healthful plant-based diet index, uPDI, unhealthful plant-based diet index; NHS, Nurses' Health Study.

**eTable 2.** Relative risks (95% confidence interval) for hip fracture according to quintiles of cumulative modified-healthy plant-based diet scores in the Nurses' Health Study (n= 70,285 postmenopausal)

|                                                                                         | Quintile 1<br>(lowest) | Quintile 2        | Quintile 3        | Quintile 4        | Quintile 5        | P-trend<br>value |
|-----------------------------------------------------------------------------------------|------------------------|-------------------|-------------------|-------------------|-------------------|------------------|
| <b>Healthful Plant-Based Diet Index with yogurt (positive score)</b>                    |                        |                   |                   |                   |                   |                  |
| No. of cases/persons-years                                                              | 350/277,395            | 420/310,302       | 424/312,633       | 421/320,734       | 423/317,038       |                  |
| Multivariable model                                                                     | Ref. 1.                | 1.03 (0.89, 1.19) | 0.99 (0.86, 1.15) | 0.94 (0.81, 1.09) | 0.92 (0.78, 1.07) | 0.19             |
| <b>Healthful Plant-Based Diet Index with fish (positive score)</b>                      |                        |                   |                   |                   |                   |                  |
| No. of cases/persons-years                                                              | 347/280,332            | 394/304,102       | 450/318,641       | 420/319,319       | 427/315,707       |                  |
| Multivariable model                                                                     | Ref. 1.                | 1.01 (0.87, 1.17) | 1.07 (0.92, 1.23) | 0.98 (0.84, 1.14) | 0.98 (0.84, 1.15) | 0.66             |
| <b>Healthful Plant-Based Diet Index with poultry (positive score)</b>                   |                        |                   |                   |                   |                   |                  |
| No. of cases/persons-years                                                              | 360/277,128            | 397/307,316       | 435/314,022       | 448/325,644       | 398/313,991       |                  |
| Multivariable model                                                                     | Ref. 1.                | 0.97 (0.83, 1.12) | 1.00 (0.86, 1.16) | 0.99 (0.85, 1.16) | 0.89 (0.75, 1.05) | 0.20             |
| <b>Healthful Plant-Based Diet Index with fish, poultry, and yogurt (positive score)</b> |                        |                   |                   |                   |                   |                  |
| No. of cases/persons-years                                                              | 398/274,991            | 416/300,622       | 438/318,957       | 415/326,772       | 371/316,760       |                  |

|                     |         |                   |                   |                   |                   |      |
|---------------------|---------|-------------------|-------------------|-------------------|-------------------|------|
| Multivariable model | Ref. 1. | 0.96 (0.83, 1.10) | 0.98 (0.85, 1.13) | 0.93 (0.80, 1.09) | 0.86 (0.73, 1.02) | 0.21 |
|---------------------|---------|-------------------|-------------------|-------------------|-------------------|------|

Multivariable model: age and energy intake, physical activity, BMI, height, history of diabetes, smoking, alcohol intake, post-menopausal hormone use, thiazides, furosemide-like diuretics, anti-inflammatory steroids, multivitamin supplements, supplemental intakes of calcium, vitamin D and retinol.

**eTable 3.** Relative risks (95% confidence interval) for hip fracture according to quintiles of cumulative food categories scores in the Nurses' Health Study (n= 70,285, postmenopausal)

|                                       | Quintile 1<br>(lowest) | Quintile 2        | Quintile 3        | Quintile 4        | Quintile 5        | P-trend value |
|---------------------------------------|------------------------|-------------------|-------------------|-------------------|-------------------|---------------|
| <b>Total plant-food intake</b>        |                        |                   |                   |                   |                   |               |
| Cases/persons-years                   | 344/271,220            | 411/310,751       | 443/323,124       | 439/323,849       | 401/309,157       |               |
| Multivariable-adjusted model          | Ref. 1.0               | 1.07 (0.92, 1.25) | 1.13(0.95, 1.34)  | 1.07 (0.89, 1.29) | 1.04 (0.85, 1.28) | 0.72          |
| <b>Healthful plant-food intake</b>    |                        |                   |                   |                   |                   |               |
| Cases/persons-years                   | 358/265,538            | 389/306,135       | 454/321,171       | 436/325,997       | 401/319,260       |               |
| Multivariable-adjusted model          | Ref. 1.0               | 0.96 (0.82 1.11)  | 1.05 (0.90, 1.21) | 1.00 (0.86, 1.16) | 0.95 (0.80, 1.12) | 0.74          |
| <b>Less healthy plant food intake</b> |                        |                   |                   |                   |                   |               |
| Cases/persons-years                   | 383/279,517            | 414/324,774       | 404/326,745       | 447/318,456       | 390/288,608       |               |
| Multivariable-adjusted model          | Ref. 1.0               | 0.93 (0.80, 1.08) | 0.89 (0.75, 1.05) | 0.98 (0.82, 1.17) | 0.97 (0.79, 1.19) | 0.94          |
| <b>Animal food intake</b>             |                        |                   |                   |                   |                   |               |
| Cases/persons-years                   | 434/286,254            | 453/315,848       | 420/323,164       | 378/320,887       | 353/291,947       |               |
| Multivariable-adjusted model          | Ref. 1.0               | 1.01 (0.88, 1.15) | 0.98 (0.84, 1.13) | 0.92 (0.78, 1.08) | 0.95 (0.80, 1.15) | 0.45          |

Multivariable-adjusted model: age and energy intake physical activity, BMI, height, history of diabetes, smoking, alcohol intake, post-menopausal hormone use, thiazides, furosemide-like diuretics, anti-inflammatory steroids, multivitamin supplements, supplemental intakes of calcium, vitamin D and retinol.



**eTable 4.** Relative risks (95% confidence interval) for hip fracture according to quintiles of cumulative plant-based diet indices with different latency periods in the Nurses' Health Study\*

|                                     | 2y latency        | 6y latency        | 10y latency       |
|-------------------------------------|-------------------|-------------------|-------------------|
| <b>Healthful Plant-Based Diet</b>   |                   |                   |                   |
| Quintile 1 (lowest)                 | Ref 1.0           | Ref 1.0           | Ref 1.0           |
| Quintile 2                          | 1.06 (0.91, 1.23) | 1.14 (0.97, 1.35) | 1.21 (1.00, 1.46) |
| Quintile 3                          | 0.96 (0.82, 1.13) | 1.08 (0.91, 1.28) | 1.06 (0.88, 1.29) |
| Quintile 4                          | 1.03 (0.88, 1.21) | 1.08 (0.90, 1.28) | 1.18 (0.97, 1.43) |
| Quintile 5                          | 0.95 (0.81, 1.12) | 1.00 (0.83, 1.20) | 1.11 (0.91, 1.36) |
| P-trend                             | 0.46              | 0.59              | 0.52              |
| <b>Unhealthful Plant-Based Diet</b> |                   |                   |                   |
| Quintile 1 (lowest)                 | Ref 1.0           | Ref 1.0           | Ref 1.0           |
| Quintile 2                          | 1.04 (0.89, 1.21) | 1.07 (0.91, 1.25) | 1.03 (0.87, 1.23) |
| Quintile 3                          | 1.03 (0.89, 1.20) | 0.96 (0.81, 1.13) | 0.97 (0.81, 1.16) |
| Quintile 4                          | 1.10 (0.94, 1.28) | 1.05 (0.89, 1.24) | 0.90 (0.75, 1.08) |
| Quintile 5                          | 1.05 (0.89, 1.23) | 0.97 (0.81, 1.15) | 0.97 (0.80, 1.18) |
| P-trend                             | 0.43              | 0.68              | 0.37              |

Adjusted for: age and energy intake, physical activity, BMI, height, history of diabetes, physical activity, smoking, alcohol intake, post-menopausal hormone use, thiazides, furosemide-like diuretics, anti-inflammatory steroids, multivitamin supplements, supplemental intakes of calcium, vitamin D and retinol.

**eTable 5.** Relative Risks (95% confidence interval) for hip fracture according to quintiles of cumulative Plant-Based Diet Indices with different latency periods in the Nurses' Health Study\*

|                                    | Quintile 1<br>(lowest) | Quintile 2        | Quintile 3        | Quintile 4        | Quintile 5        | P-trend<br>value | P-for<br>interaction |
|------------------------------------|------------------------|-------------------|-------------------|-------------------|-------------------|------------------|----------------------|
| <b>Healthful Plant-Based Diet</b>  |                        |                   |                   |                   |                   |                  |                      |
| <b>Age</b>                         |                        |                   |                   |                   |                   |                  |                      |
| <b>Age&lt;75 years</b>             |                        |                   |                   |                   |                   |                  | 0.73                 |
| Multivariable-adjusted model       | Ref. 1.                | 1.08 (0.88, 1.31) | 0.99 (0.81, 1.22) | 1.03 (0.84, 1.27) | 0.86 (0.69, 1.07) | 0.16             |                      |
| <b>Age≥75 years</b>                |                        |                   |                   |                   |                   |                  |                      |
| Multivariable-adjusted model       | Ref. 1.                | 1.18 (0.96, 1.47) | 0.96 (0.77, 1.21) | 1.10 (0.88, 1.37) | 1.11 (0.88, 1.40) | 0.66             |                      |
| <b>BMI (Kg/m<sup>2</sup>)</b>      |                        |                   |                   |                   |                   |                  |                      |
| <b>BMI &lt;25 Kg/m<sup>2</sup></b> |                        |                   |                   |                   |                   |                  | 0.12                 |
| Multivariable-adjusted model       | Ref. 1.                | 1.15 (0.94, 1.40) | 0.99 (0.81, 1.21) | 0.99 (0.81, 1.23) | 0.94 (0.76, 1.16) | 0.20             |                      |
| <b>BMI ≥25Kg/m<sup>2</sup></b>     |                        |                   |                   |                   |                   |                  |                      |
| Multivariable-adjusted model       | Ref. 1.                | 1.10 (0.88, 1.37) | 0.96 (0.76, 1.21) | 1.17 (0.93, 1.46) | 1.06 (0.83, 1.36) | 0.51             |                      |
| <b>Physical Activity</b>           |                        |                   |                   |                   |                   |                  |                      |
|                                    |                        |                   |                   |                   |                   |                  | 0.06                 |

|                                                    |         |                    |                   |                   |                   |      |      |
|----------------------------------------------------|---------|--------------------|-------------------|-------------------|-------------------|------|------|
| <b>Physical activity &lt;median (9.3 MET-h/wk)</b> |         |                    |                   |                   |                   |      |      |
| Multivariable-adjusted model                       | Ref. 1. | 1.11 (0.91, 10.34) | 0.99 (0.80, 1.21) | 1.06 (0.86, 1.31) | 1.01 (0.81, 1.27) | 0.95 |      |
| <b>Physical activity ≥median (9.3 MET-h/wk)</b>    |         |                    |                   |                   |                   |      |      |
| Multivariable-adjusted model                       | Ref. 1. | 1.15 (0.91, 1.43)  | 0.97 (0.77, 1.22) | 1.08 (0.86, 1.36) | 0.98 (0.78, 1.23) | 0.56 |      |
| <b>Unhealthy Plant-Based Diet</b>                  |         |                    |                   |                   |                   |      |      |
| <b>Age</b>                                         |         |                    |                   |                   |                   |      |      |
|                                                    |         |                    |                   |                   |                   |      |      |
| <b>Age &lt;75 years</b>                            |         |                    |                   |                   |                   |      |      |
| Multivariable-adjusted model                       | Ref. 1. | 0.86 (0.71, 1.06)  | 0.94 (0.77, 1.14) | 1.00 (0.82, 1.23) | 1.02 (0.82, 1.26) | 0.46 |      |
| <b>Age ≥75 years</b>                               |         |                    |                   |                   |                   |      |      |
| Multivariable-adjusted model                       | Ref. 1. | 1.18 (0.94, 1.47)  | 1.15 (0.92, 1.44) | 1.19 (0.95, 1.49) | 1.05 (0.82, 1.33) | 0.83 |      |
| <b>BMI (Kg/m<sup>2</sup>)</b>                      |         |                    |                   |                   |                   |      |      |
| <b>BMI &lt;25Kg/m<sup>2</sup></b>                  |         |                    |                   |                   |                   |      | 0.08 |

|                                                                 |         |                   |                   |                   |                   |      |      |
|-----------------------------------------------------------------|---------|-------------------|-------------------|-------------------|-------------------|------|------|
| Multivariable-adjusted model                                    | Ref. 1. | 1.10 (0.90, 1.34) | 0.90 (0.73, 1.11) | 1.10 (0.90, 1.34) | 1.00 (0.81, 1.24) | 0.98 |      |
| <b>BMI <math>\geq 25\text{Kg/m}^2</math></b>                    |         |                   |                   |                   |                   |      |      |
| Multivariable-adjusted model                                    | Ref. 1  | 0.89 (0.70, 1.11) | 1.22 (0.98, 1.52) | 1.07 (0.85, 1.34) | 1.00 (0.78, 1.28) | 0.51 |      |
| <b>Physical Activity</b>                                        |         |                   |                   |                   |                   |      | 0.73 |
| <b>Physical activity &lt;median (9.3 MET-h/wk)</b>              |         |                   |                   |                   |                   |      |      |
| Multivariable-adjusted model                                    | Ref. 1  | 1.04 (0.82, 1.33) | 1.16 (0.92, 1.46) | 1.17 (0.93, 1.48) | 1.05 (0.83, 1.33) | 0.61 |      |
| <b>Physical activity <math>\geq</math>median (9.3 MET-h/wk)</b> |         |                   |                   |                   |                   |      |      |
| Multivariable-adjusted model                                    | Ref. 1  | 1.00 (0.83, 1.21) | 0.95 (1.77, 1.16) | 1.04 (0.85, 1.28) | 1.04 (0.83, 1.30) | 0.66 |      |

Multivariable-adjusted model: age and energy intake physical activity, BMI, height, history of diabetes, smoking, alcohol intake, post-menopausal hormone use, thiazides, furosemide-like diuretics, anti-inflammatory steroids, multivitamin supplements, supplemental intakes of calcium, vitamin D and retinol
