# Supplementary material for: Plant-Based Diets and Risk of Hip Fracture in Postmenopausal Women
Source: PubMed Central journal article supplement (PMC10905300; doi:10.1001/jamanetworkopen.2024.1107), 2024-02-29
Supplement: jamanetwopen-e241107-s002.pdf [file jamanetwopen-e241107-s002.pdf]

## Data Sharing Statement

Sotos-Prieto. Plant-Based Diets and Risk of Hip Fracture in Postmenopausal Women. *JAMA Netw Open*. Published March 04, 2024. doi:10.1001/jamanetworkopen.2024.1107

### Data

**Data available:** No
